# Deficient Dopamine D<sub>2</sub> Receptor Function Causes Renal Inflammation Independently of High Blood Pressure

Yanrong Zhang<sup>1</sup>, Santiago Cuevas<sup>1</sup>, Laureano D. Asico<sup>1</sup>, Crisanto Escano<sup>1</sup>, Yu Yang<sup>1</sup>, Annabelle M. Pascua<sup>1</sup>, Xiaoyan Wang<sup>1</sup>, John E. Jones<sup>1</sup>, David Grandy<sup>2</sup>, Gilbert Eisner<sup>3</sup>, Pedro A. Jose<sup>1</sup>, Ines Armando<sup>1\*</sup>

**1** Division of Nephrology, Department of Medicine, School of Medicine, University of Maryland, Baltimore, Maryland, United States of America, **2** Department of Physiology and Pharmacology, Oregon Health and Science University, Portland, Oregon, United States of America, **3** Department of Medicine, Georgetown University Medical Center, Washington DC, United States of America

## Abstract

Renal dopamine receptors participate in the regulation of blood pressure. Genetic factors, including polymorphisms of the dopamine D<sub>2</sub> receptor gene (*DRD2*) are associated with essential hypertension, but the mechanisms of their contribution are incompletely understood. Mice lacking *Drd2* (*D<sub>2</sub>-/-*) have elevated blood pressure, increased renal expression of inflammatory factors, and renal injury. We tested the hypothesis that decreased dopamine D<sub>2</sub> receptor (D<sub>2</sub>R) function increases vulnerability to renal inflammation independently of blood pressure, is an immediate cause of renal injury, and contributes to the subsequent development of hypertension. In *D<sub>2</sub>-/-* mice, treatment with apocynin normalized blood pressure and decreased oxidative stress, but did not affect the expression of inflammatory factors. In mouse RPTCs *Drd2* silencing increased the expression of TNF $\alpha$  and MCP-1, while treatment with a D<sub>2</sub>R agonist abolished the angiotensin II-induced increase in TNF- $\alpha$  and MCP-1. In uni-nephrectomized wild-type mice, selective *Drd2* silencing by subcapsular infusion of *Drd2* siRNA into the remaining kidney produced the same increase in renal cytokines/chemokines that occurs after *Drd2* deletion, increased the expression of markers of renal injury, and increased blood pressure. Moreover, in mice with two intact kidneys, short-term *Drd2* silencing in one kidney, leaving the other kidney undisturbed, induced inflammatory factors and markers of renal injury in the treated kidney without increasing blood pressure. Our results demonstrate that the impact of decreased D<sub>2</sub>R function on renal inflammation is a primary effect, not necessarily associated with enhanced oxidant activity, or blood pressure; renal damage is the cause, not the result, of hypertension. Deficient renal D<sub>2</sub>R function may be of clinical relevance since common polymorphisms of the human *DRD2* gene result in decreased D<sub>2</sub>R expression and function.

**Citation:** Zhang Y, Cuevas S, Asico LD, Escano C, Yang Y, et al. (2012) Deficient Dopamine D<sub>2</sub> Receptor Function Causes Renal Inflammation Independently of High Blood Pressure. PLOS ONE 7(6): e38745. doi:10.1371/journal.pone.0038745

**Editor:** Jean-Claude Dussault, INSERM, France

**Received:** December 15, 2011; **Accepted:** May 10, 2012; **Published:** June 14, 2012

**Copyright:** © 2012 Zhang et al. This is an open-access article distributed under the terms of the Creative Commons Attribution License, which permits unrestricted use, distribution, and reproduction in any medium, provided the original author and source are credited.

**Funding:** This work was supported in part by grants from the National Institutes of Health, HL068686, HL023081, HL074940, HL092196, DK039308 and DK090918 (www.NIH.gov). The funders had no role in study design, data collection and analysis, decision to publish, or preparation of the manuscript.

**Competing Interests:** The authors have declared that no competing interests exist.

\* E-mail: iarmando@medicine.umaryland.edu

## Introduction

Dopamine synthesized in the kidney is necessary for the maintenance of normal blood pressure and renal function [1]. The disruption of any of the dopamine receptor subtype genes in mice produces receptor subtype-specific hypertension [2]. In particular, the hypertension in mice with disruption of the dopamine D<sub>2</sub> receptor (*Drd2*) gene (*D<sub>2</sub>-/-*) is associated with increased production of reactive oxygen species (ROS) [3,4].

Infiltration of inflammatory cells and oxidative stress in the kidney are involved in the development of renal injury and the induction and maintenance of hypertension [5]. Renal tubule cells produce both pro- and anti-inflammatory cytokines and chemokines [6], which are secreted across their apical and basolateral membranes [7], and contribute to the development and progression of glomerular and tubular injury. However, the factors that regulate cytokine production in these cells are incompletely understood. Dopamine and dopaminergic drugs have been shown to regulate the immune response and the inflammatory reaction

[8]. Dopamine inhibits the release of IFN $\gamma$ , IL-2, and IL-4 [9] and the lipopolysaccharide-stimulated production of IL-12p40 [10] in immune cells. Administration of dopamine or dopaminergic agonists *in vivo* reduces the TNF $\alpha$  response to endotoxin [11] and the activation of leukocytes in experimental sepsis [12]. Conversely, treatment with a dopaminergic antagonist stimulates constitutive and inducible gene expression of IL-1 $\beta$ , IL-6, and TNF $\alpha$  in macrophages [13]. In brain-dead rats, a condition that is associated with profound inflammation in end-organs, dopamine reduces renal monocyte infiltration [14], expression of IL-6, and improves renal function after transplantation [15]. Furthermore, mice with intrarenal dopamine deficiency have increased oxidative stress and infiltration of inflammatory cells [16] and decreased renal dopamine production is associated with increased detrimental effects of Ang II on renal injury [17].

The anti-inflammatory effects of dopamine and dopaminergic agonists are mediated, at least in part, by the D<sub>2</sub>R. D<sub>2</sub>Rs are expressed in lymphocytes, monocytes, neutrophils, macrophages, and other immuno-competent cells [18]. The D<sub>2</sub>R/D<sub>3</sub>R agonist,

bromocriptine, inhibits lymphocyte proliferation [19] and decreases antigen-induced macrophage activation and secretion of IL-2, IL-4, and IFN $\gamma$  [11]. In normal human lymphocytes, D<sub>2</sub>R agonists increase the secretion of anti-inflammatory cytokines by *de novo* gene expression [20]. GLC756, a novel mixed dopamine D<sub>1</sub>R antagonist and D<sub>2</sub>R agonist, inhibits the release of TNF $\alpha$  from activated mast cells [21].

We hypothesized that the D<sub>2</sub>R decreases renal inflammation and prevents renal injury by regulating the inflammatory response in renal proximal tubule cells (RPTCs). To test this hypothesis, we studied parameters of inflammation and injury in the renal cortex of D<sub>2</sub><sup>-/-</sup> mice and the effect of D<sub>2</sub>R silencing on the expression of inflammatory factors in mouse RPTCs. Because angiotensin (Ang) II and dopamine receptors counter-regulate each other and Ang II, via the AT<sub>1</sub>R, promotes inflammation and renal injury [17,18,22], we also determined if stimulation of D<sub>2</sub>R opposes the effects of Ang II in these cells. Because D<sub>2</sub>R deficiency increases blood pressure and oxidative stress, we studied the effects of normalizing blood pressure and decreasing oxidative stress on the renal expression of cytokines/chemokines in D<sub>2</sub><sup>-/-</sup> mice. Finally, we studied renal expression of inflammatory factors and markers of renal injury in two mouse models of selective *Drd2* silencing in the kidney.

## Methods

### D<sub>2</sub> Receptor-deficient Mice

The original F2 hybrid strain (129/SvXC57BL/6J, Oregon Health Sciences University) that contained the mutated *Drd2* allele (D<sub>2</sub><sup>-/-</sup>) was bred onto the C57BL/6J background for >20 generations [3]. All animal-related studies were approved by the Institutional Animal Care and Use Committee. D<sub>2</sub><sup>-/-</sup> mice and wild-type littermates (D<sub>2</sub><sup>+/+</sup>) were studied at 6 to 8 months of age. Mice were housed in metabolic cages for 24 h urine collection and then anesthetized for blood pressure measurement via the femoral artery, as reported previously [4]. The organs were harvested and flash-frozen. As we have reported previously [4], both systolic (121 $\pm$ 3 (D<sub>2</sub><sup>-/-</sup>) vs. 89 (D<sub>2</sub><sup>+/+</sup>) mm Hg; n=9; P<0.01) and diastolic blood pressures (87 $\pm$ 2 (D<sub>2</sub><sup>-/-</sup>) vs. 63 $\pm$ 5 (D<sub>2</sub><sup>+/+</sup>) mm Hg; n=9; P<0.02), were increased in D<sub>2</sub><sup>-/-</sup> mice, relative to D<sub>2</sub><sup>+/+</sup> littermates. A group of mice was treated for 10 days with apocynin (3 mg/kg/day, Sigma, St. Louis, MO), which inhibits NADPH oxidase activity, or vehicle, via a subcutaneously implanted osmotic mini-pump (Alzet<sup>®</sup>, Cupertino, CA). Urine collection, blood pressure measurement and tissue harvesting were performed as described above.

### Acute Renal Specific Down-regulation of D<sub>2</sub>R

Renal cortical *Drd2* was silenced by the subcapsular infusion of *Drd2*-specific siRNA via an osmotic minipump. Adult male C57BL/6J mice were uni-nephrectomized one week prior to the implantation of the minipump. For the implantation, the mice were anesthetized with pentobarbital (50 mg/kg body weight, intraperitoneally). The osmotic minipumps (100  $\mu$ l; flow rate: 0.5  $\mu$ l/hr for 7 days) were filled with validated *Drd2*-specific siRNA (delivery rate 3  $\mu$ g/day) or non-silencing siRNA as control. The siRNAs were dissolved in an *in vivo* transfection reagent (TransIT<sup>®</sup> In Vivo Gene Delivery System, Mirus) under sterile conditions. The minipumps were fitted with a polyethylene delivery tubing (Alzet #0007701) and the tip of the tubing was delivered within the subcapsular space of the remaining kidney. Surgical glue was applied at the puncture site to hold the tubing in place and prevent extra-renal leakage. The osmotic pump was

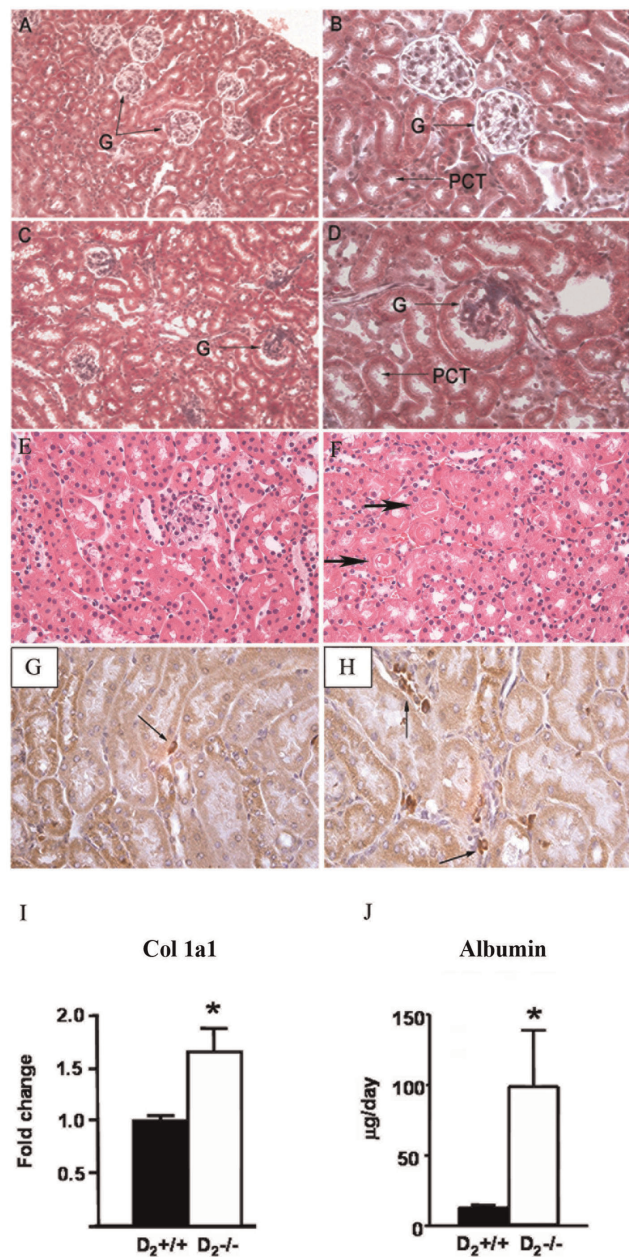

**Figure 1. Renal inflammation and injury in D<sub>2</sub><sup>-/-</sup> mice.** Masson stained sections of D<sub>2</sub><sup>+/+</sup> mouse kidney (A and B) and D<sub>2</sub><sup>-/-</sup> mouse kidney (C and D). H-E stained sections of D<sub>2</sub><sup>+/+</sup> mouse kidney (E) and D<sub>2</sub><sup>-/-</sup> mouse kidney (F). G: glomerulus. PCT: proximal convoluted tubule. Proteinaceous casts are marked with arrows (F). Sections from 3 mouse kidneys per group were studied. G and H: Inflammatory cell infiltration. Kidney sections from D<sub>2</sub><sup>+/+</sup> (G) and D<sub>2</sub><sup>-/-</sup> (H) mice were immunostained for the presence of macrophages and monocytes (arrows). The number of positive cells in 10 randomly selected fields was greater in D<sub>2</sub><sup>-/-</sup> (68 $\pm$ 3) than in D<sub>2</sub><sup>+/+</sup> (15 $\pm$ 1, P<0.01) mice. Sections from 3 mouse kidneys per group were studied. I. Renal cortical expression of Col 1 $\alpha$ 1 mRNA determined by qRT-PCR. Results were corrected for expression of GAPDH mRNA and expressed as fold change in comparison to their expression in D<sub>2</sub><sup>+/+</sup> mice. \*P<0.05 vs D<sub>2</sub><sup>+/+</sup>; n=5/group. J. Urinary microalbuminuria. Urine samples were collected for 24 h from mice in metabolic cages. Albumin was measured by ELISA. \*P<0.04 vs. D<sub>2</sub><sup>+/+</sup>; n=5/group. Magnification: A and C: 100X; B, D, G and H: 400X; E-F: 200X.  
doi:10.1371/journal.pone.0038745.g001

**Table 1.** Gene expression profiling of cytokines, chemokines and receptors in the kidney of  $D_2^{+/+}$  and  $D_2^{-/-}$  mice.

| Genes                           |                                                 | Fold change |
|---------------------------------|-------------------------------------------------|-------------|
| <b>Up-regulated</b>             |                                                 |             |
| <i>Ccl2</i>                     | Chemokine (C-C motif) ligand 2 (MCP-1)          | 1.87        |
| <i>Ccl8</i>                     | Chemokine (C-C motif) ligand 8 (MCP-2)          | 1.95        |
| <i>Ccl7</i>                     | Chemokine (C-C motif) ligand 7 (MCP-3)          | 2.19        |
| <i>Ccl12</i>                    | Chemokine (C-C motif) ligand 12 (MCP-4)         | 2.78        |
| <i>Tnfa</i>                     | Tumor necrosis factor alpha                     | 1.65        |
| <i>Lta</i>                      | Lymphotoxin $\alpha$ (Lta/TNF $\beta$ )         | 1.41        |
| <i>Ltb</i>                      | Lymphotoxin $\beta$ (Ltb/TNF C)                 | 2.02        |
| <i>Cxcr5</i>                    | Chemokine (C-X-C motif) receptor 5              | 2.19        |
| <i>Ccl11</i>                    | Chemokine (C-C motif) ligand 11 (eotaxin-1)     | 2.68        |
| <i>Ccl17</i>                    | Chemokine (C-C motif) ligand 17                 | 2.37        |
| <i>Ccl20</i>                    | Chemokine (C-C motif) ligand 20                 | 3.09        |
| <i>Ccl25</i>                    | Chemokine (C-C motif) ligand 25                 | 2.75        |
| <i>Ccr7</i>                     | Chemokine (C-C motif) receptor 7                | 2.61        |
| <i>Cxcl9</i>                    | Chemokine (C-X-C motif) ligand 9 (MIG)          | 2.16        |
| <i>Ccl5</i>                     | Chemokine (C-C motif) ligand 5 (RANTES)         | 1.59        |
| <i>Ccl4</i>                     | Chemokine (C-C motif) ligand 4 (MIP- $\alpha$ ) | 1.64        |
| <i>Cxcl10</i>                   | Chemokine (C-X-C motif) ligand 10               | 1.72        |
| <i>Cxcl11</i>                   | Chemokine (C-X-C motif) ligand 11               | 1.71        |
| <i>Il-10</i>                    | Interleukin 10                                  | 1.78        |
| <i>Il-18</i>                    | Interleukin 18                                  | 2.07        |
| <i>Il-5 ra</i>                  | Interleukin 5 receptor, $\alpha$                | 3.13        |
| <b>Down-regulated</b>           |                                                 |             |
| <i>Ccl1</i>                     | Chemokine (C-C motif) ligand 1                  | -2.46       |
| <i>Ccl24</i>                    | Chemokine (C-C motif) ligand 24                 | -2.00       |
| <i>Ccr1</i>                     | Chemokine (C-C motif) receptor 1                | -2.27       |
| <i>Crp</i>                      | C-reactive protein, pentraxin-related           | -2.49       |
| <i>Pf4</i>                      | Platelet factor 4                               | -2.03       |
| <i>Cxcl12</i>                   | Chemokine (C-X-C motif) ligand 12               | -1.75       |
| <i>Il-11</i>                    | Interleukin 11                                  | -2.02       |
| <i>Il-13</i>                    | Interleukin 13                                  | -3.20       |
| <i>Il-17B</i>                   | Interleukin 17B                                 | -3.57       |
| <i>Il-20</i>                    | Interleukin 20                                  | -5.70       |
| <i>Il-3</i>                     | Interleukin 3                                   | -2.36       |
| <i>Il-4</i>                     | Interleukin 4                                   | -1.71       |
| <i>Il-1f6</i>                   | Interleukin 1 family, member 6                  | -2.43       |
| <i>Il-8rf<math>\beta</math></i> | Interleukin 8 receptor,                         | -3.72       |
| <i>Cd40lg</i>                   | CD40 ligand                                     | -2.90       |

Fold-change was calculated by the  $\Delta$  Ct method. n = 3/group.  
doi:10.1371/journal.pone.0038745.t001

sutured to the abdominal wall to prevent excessive movement of the pump for the duration of the study.

Silencing of *Drd2* was also performed in mice that did not undergo unilateral nephrectomy. *Drd2*-specific siRNA was infused, as described above, under the capsule of the left kidney of C57BL/6J mice while the right kidney was left undisturbed. In both groups, blood pressure was measured, as above, before and after

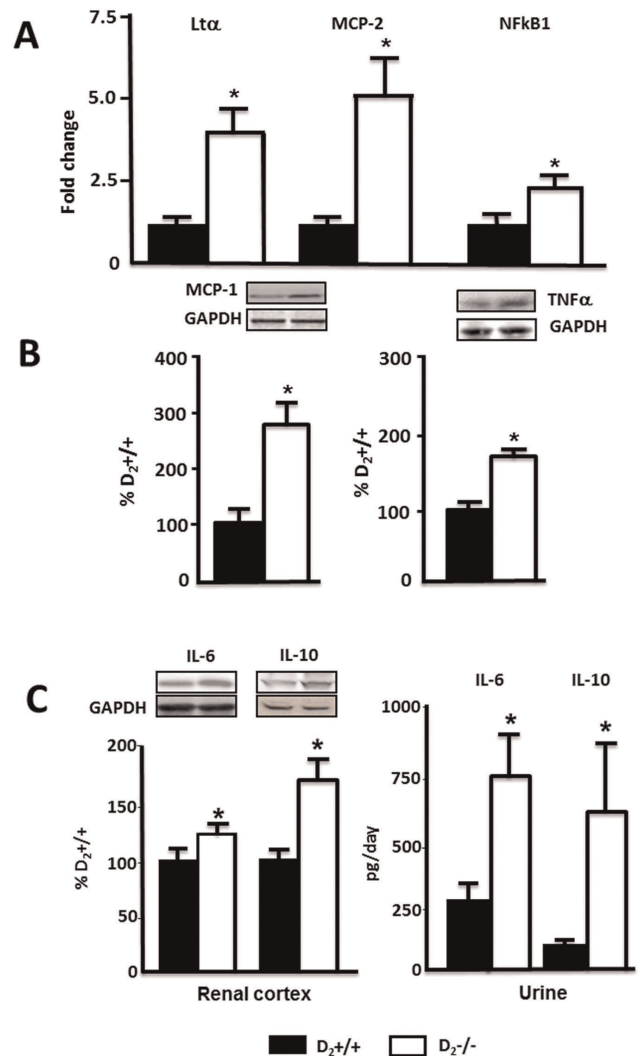

**Figure 2. Expression of chemokines/cytokines in renal cortex and urine of  $D_2^{-/-}$  mice.** **A.** Expression of *Lt $\alpha$* , *MCP-2*, and *NF $\kappa$ B1* mRNA was quantified by qRT-PCR; results were corrected for expression of *GAPDH* mRNA and expressed as fold change in comparison to their expression in  $D_2^{+/+}$  mice. \* $P < 0.03$  vs.  $D_2^{+/+}$  mice. **B.** Protein expression of *MCP-1* (17 kDa) and *TNF $\alpha$*  protein (25 kDa) was semi-quantified by immunoblotting. Inset shows one set of immunoblots. Results were corrected for expression of actin and expressed as percentage of the expression in  $D_2^{+/+}$  mice, \* $P < 0.02$  vs.  $D_2^{+/+}$  mice, n = 5/group. **C.** Protein expression of *IL-6* (25 kDa) and *IL-10* (20 kDa) protein semi-quantified by immunoblotting. Results were corrected for expression of actin and expressed as percentage of the expression in  $D_2^{+/+}$ , \* $P < 0.05$  vs.  $D_2^{+/+}$  mice, n = 5/group. Urinary excretion of *IL-6* and *IL-10* was quantified by ELISA. \* $P < 0.02$  vs.  $D_2^{+/+}$  mice, n = 5/group. doi:10.1371/journal.pone.0038745.g002

the 7-day siRNA infusion. Tissues were harvested after the last blood pressure determination.

### Urine Measurements

Urinary levels of *IL-6* and *IL-10* (SABiosciences-Qiagen, Frederick, MD) and albumin (Albuwell M, Exocell, Philadelphia, PA) were determined by ELISA, the latter using an antibody specific for murine albumin. Values were corrected for urinary creatinine.

**Table 2.** Expression of cytokines and chemokines in the heart left ventricle of  $D_2^{+/+}$  and  $D_2^{-/-}$  mice determined by qRT-PCR.

|                               | $\Delta Ct D_2^{+/+}$ | $\Delta Ct D_2^{-/-}$ | Fold change | P  |
|-------------------------------|-----------------------|-----------------------|-------------|----|
| <i>MCP-1</i>                  | 5.6±0.3               | 6.6±0.7               | 0.49        | NS |
| <i>MCP-2</i>                  | 8.6±1.3               | 8.8±0.3               | 0.83        | NS |
| <i>Tnf<math>\alpha</math></i> | 10.5±0.5              | 10.7±1.8              | 0.86        | NS |
| <i>Ltx</i>                    | 11.7±1.2              | 12.0±0.3              | 0.79        | NS |
| <i>Il-5 ra</i>                | 13.6±0.4              | 13.9±1.8              | 0.83        | NS |
| <i>IL-11</i>                  | 13.4±0.8              | 13.3±1.9              | 1.05        | NS |
| <i>IL-13</i>                  | 14.0±0.4              | 14.2±1.4              | 0.90        | NS |

Fold-change was calculated by the  $\Delta\Delta Ct$  method. Abbreviations as in Table 1. NS = not significant; n = 5/group. doi:10.1371/journal.pone.0038745.t002

### Cell Culture

Undifferentiated mouse cells were cultured from progenitor kidney cells, kindly supplied by Dr. Ulrich Hopfer (Case Western Reserve University, School of Medicine), isolated from mouse embryo kidneys following the procedure described by Woost et al. [23]. Differentiated mouse RPTCs were cultured to 60–70% confluence and transfected (Hyperfect, Qiagen, Valencia, CA) with vehicle, non-silencing siRNA (30 nmol/l; All stars, Qiagen) or *Drd2* siRNA (30 nmol/l, Qiagen). Cells were studied after 72 h. For other experiments cells were cultured to 90–95% confluence, serum starved for 2 h and treated for 24 h in serum-free medium with vehicle (PBS) or 100 nmol/l Ang II in the presence or absence of 1  $\mu$ mol/l quinpirole ( $D_2R/D_3R$  agonist), or 1  $\mu$ mol/l quinpirole plus 1  $\mu$ mol/l L-741,262 ( $D_2R$  antagonist) [24].

### RNA Extraction and cDNA Preparation

Kidney samples were homogenized, and total RNA was extracted with Trizol (Invitrogen, Carlsbad, CA) and further purified using the RNeasy RNA Extraction Mini kit (Qiagen). RNA samples were converted into first strand cDNA using an RT<sup>2</sup> First Strand kit, following the manufacturer's protocol (SABiosciences-Qiagen).

### Gene Expression Profiling of Inflammatory Cytokines and Receptors

Gene expression analysis was carried out in groups of four mice using an RT<sup>2</sup> Profiler PCR array system (SABiosciences-Qiagen) that contained a panel of 84 genes. Real-time PCR was performed following the manufacturer's protocol. Quality controls were all within the recommended range. Data were analyzed by the  $\Delta Ct$  method [25].

### Quantitative Real-time PCR

Quantitative gene expression was analyzed by real-time PCR, performed on an ABI Prism 7900 HT (Applied Biosystems, Foster City, CA). The assay used gene specific primers (SABiosciences-Qiagen) and SYBR Green real-time PCR detection method and was performed as described in the manufacturer's manual. Primers used were as follows: MCP-1: PPM03151F; MCP-2: PPM03165A; TNF $\alpha$ : PPM03113F; Ltx: PPM03114A; IL-4: PPM03013E; IL-5 $\alpha$ : PPM03026E; IL-11: PPM03018E; IL-13: PPM03021A; collagen, type 1,  $\alpha 1$  (Col 1 $\alpha 1$ ): PPM-3845F; NFkB1: PPM02930E; osteopontin: PPM03648C;

Actin: PPM0294A; GAPDH: PPM02946E. Data were analyzed using the  $\Delta\Delta Ct$  method [25].

### Immunoblotting

Mouse kidney homogenates and cell lysates were subjected to immunoblotting, as reported previously [3,4]. The primary antibodies used were rat anti-mouse TNF $\alpha$  (BioLegend, San Diego, CA), rabbit polyclonal MCP-1 (Millipore, Billerica, CA), rabbit polyclonal IL-6 (Abcam, Cambridge, MA); rabbit polyclonal  $D_2R$  (Millipore), and polyclonal anti-actin (Sigma). The densitometry values were corrected by the expression of GAPDH and are shown as percentage of the mean density of the control group.

### Reporter Assay

NFkB activation was analyzed via the transient expression of an NFkB luciferase reporter system by reverse transfection (Signal Reporter Assay, SABiosciences-Qiagen). Cells were treated with *Drd2*-specific siRNA or non-silencing siRNA, as described above. After 48 h, the cells were trypsinized and seeded for reverse transfection. The assay was performed following the manufacturer's procedures.

### Histochemistry and Immunohistochemistry

Formalin-fixed, paraffin-embedded tissues of  $D_2^{+/+}$  and  $D_2^{-/-}$  mice were stained with Masson trichrome to evaluate glomerular fibrosis and with hematoxylin eosin (H-E) to evaluate tubular damage. The pathological abnormalities were graded in a blinded manner. Sclerosis was defined as collapse or obliteration of the glomerular capillary tuft associated with increased hyaline matrix [26]. Glomerular sclerosis was expressed as the percentage of glomeruli showing more than 25% sclerosis.

Tissue sections were immunostained for the presence of macrophages and monocytes using a specific rat anti-mouse macrophage/monocyte monoclonal antibody (Millipore) and an avidin-biotin immunoperoxidase kit (Vectastain Elite, Vector Laboratories, Burlingame, CA). The kidneys were lightly counterstained with hematoxylin. The total number of positive cells in 10 randomly selected fields was counted.

### Statistical Analysis

Data are mean  $\pm$  SEM. Comparisons between 2 groups used the Student's t test. One-way ANOVA followed by post-hoc analysis using the Newman-Keuls multiple comparison test was used to assess significant differences among three or more groups.  $P < 0.05$  was considered statistically significant.

## Results

### Renal Injury and Inflammation Occurs in $D_2^{-/-}$ Mice

Masson staining of  $D_2^{-/-}$  mouse kidney sections showed glomerulosclerosis and dilation of renal tubules (Fig 1C–D). H-E staining showed the presence of tubular proteinaceous casts (Figure 1F). These lesions were not observed in  $D_2^{+/+}$  mice (Figure 1A, B, E). The percentage of glomeruli showing more than 25% sclerosis was greater in  $D_2^{-/-}$  than  $D_2^{+/+}$  mice (35±9% vs. 5±6%,  $P < 0.01$ ). There were more infiltrating macrophages/monocytes in kidney sections from  $D_2^{-/-}$  mice (Figure 1H) than  $D_2^{+/+}$  mice (Figure 1G) (68±3 vs. 15±1 positive cells/10 fields,  $P < 0.01$ ). The level of mRNA expression of Col 1 $\alpha 1$  was about 60% higher in renal cortex of  $D_2^{-/-}$  than  $D_2^{+/+}$  mice (Figure 1I). Microalbuminuria, a functional parameter of renal damage, was 9-fold higher in  $D_2^{-/-}$  mice than in  $D_2^{+/+}$  littermates (Figure 1J).

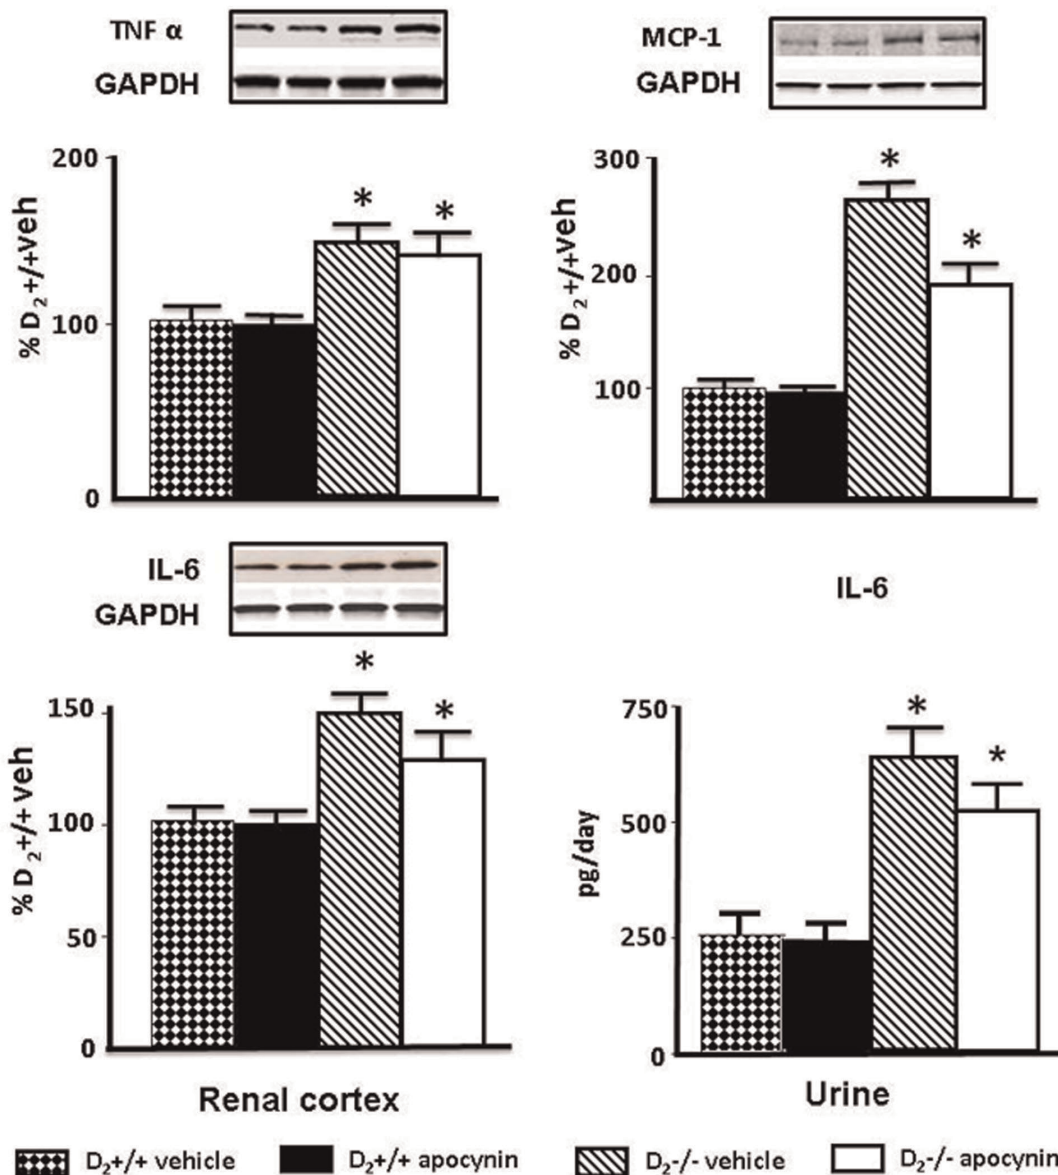

**Figure 3. Effect of apocynin on renal cortical expression of TNF $\alpha$ , MCP-1, and IL-6, and urinary excretion of IL-6.** Expression of TNF $\alpha$  (25 kDa) and MCP-1 (17 kDa) protein in renal cortex was semi-quantified by immunoblotting. Inset shows one set of immunoblots. Results were corrected for expression of GAPDH and expressed as percentage of D<sub>2</sub><sup>+/+</sup> mice treated with vehicle, \*P<0.05 vs. vehicle or apocynin treated D<sub>2</sub><sup>+/+</sup>; n=5/group. Renal expression, semi-quantified by immunoblotting (25 kDa), and urinary excretion of IL-6 quantified by ELISA in 24 h urine samples. Results are expressed as percentage of D<sub>2</sub><sup>+/+</sup> mice treated with vehicle. \*P<0.05 vs. vehicle or apocynin treated D<sub>2</sub><sup>+/+</sup>; n=5/group. doi:10.1371/journal.pone.0038745.g003

### The Expression of Chemokines and Cytokines Involved in Macrophage Recruitment and Inflammation is Increased in the Renal Cortex but not in the Left Ventricle of the Heart of D<sub>2</sub><sup>-/-</sup> Mice

Expression of 84 cytokines and chemokines was analyzed in the renal cortex of D<sub>2</sub><sup>-/-</sup> and D<sub>2</sub><sup>+/+</sup> mice using a quantitative RT-PCR (qRT-PCR) array. Twenty one genes were up-regulated and 15 were down-regulated in D<sub>2</sub><sup>-/-</sup> mice (**Table 1**). Of the genes that were up-regulated, 10 belong to the C-C subfamily of chemokines, including four of the macrophage chemoattractant group and three of the TNF superfamily. IL-10 and IL-18 genes were also up-regulated. Seven of the 15 down-regulated genes were interleukins (**Table 1**). Most of the up-regulated chemokines

are inflammatory and belong to the CCL subfamily, involved in macrophage (MCP-1, MIP-1 $\alpha$ , RANTES, MCP-2, MCP-5) and/or T cell (Eotaxin-1, TARC, MIP-3 $\alpha$ , CCL-25) recruitment, as opposed to homeostatic [27]. Some of the chemokines, belonging to the CXCL superfamily that attract neutrophils, were also up-regulated (MIG, IP-10, I-TAC) [28]. Three of the four members of the TNF superfamily of inflammatory cytokines were up-regulated, namely TNF $\alpha$ , lymphotoxin- $\alpha$  (Lt $\alpha$ ), and lymphotoxin- $\beta$  (TNF $\beta$ ). CD40L, the other member of the superfamily included in the array, was decreased. In contrast to the increased expression of pro-inflammatory chemokines, several anti-inflammatory interleukins (IL-4, IL-11, IL13, and IL-17B which stimulates IL-11) were decreased, except for IL-10 which was increased (**Table 1**).

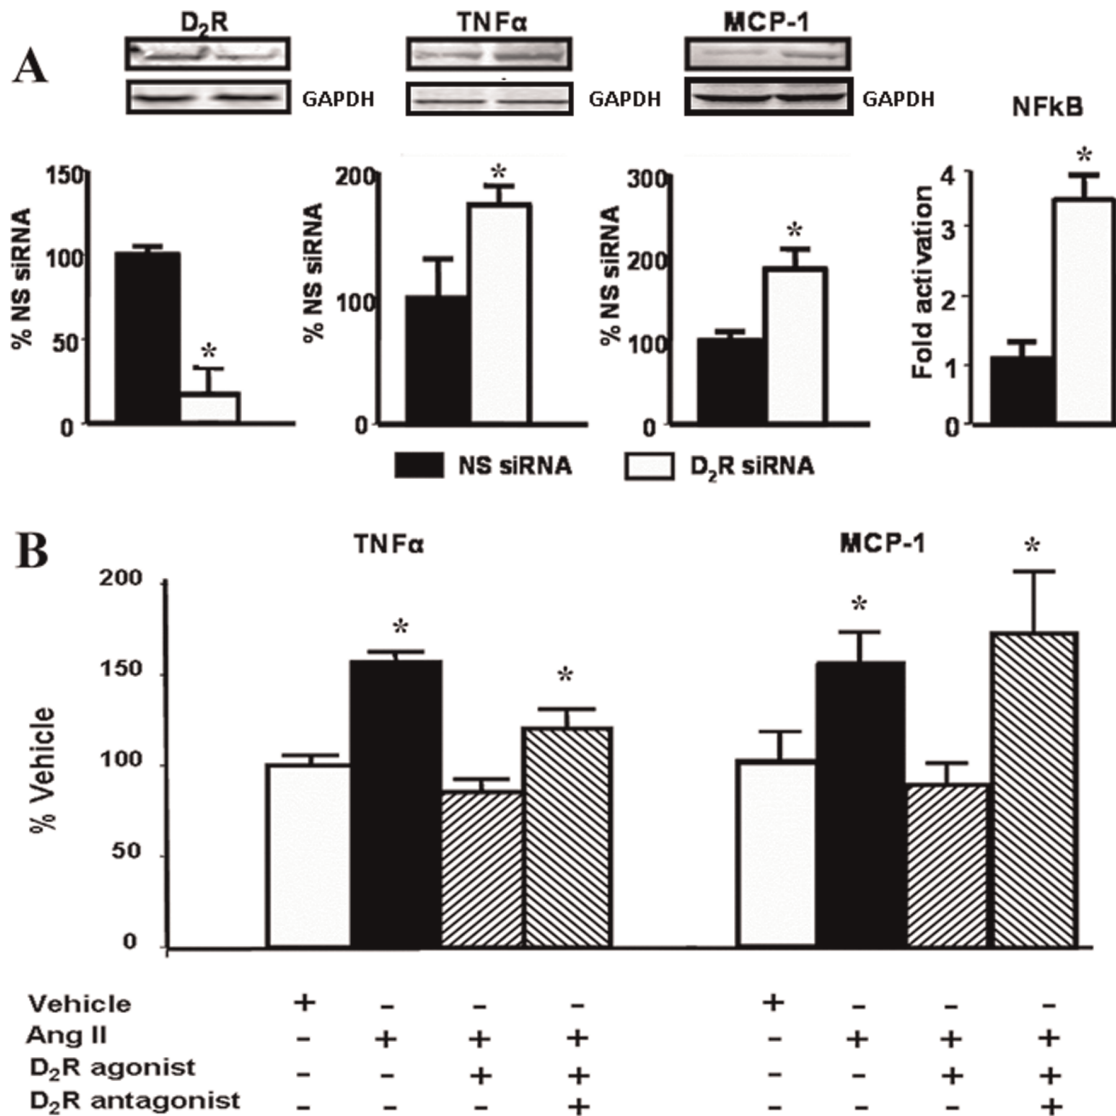

**Figure 4. D<sub>2</sub>R function in mouse renal proximal tubule cells** **A.** Effect of silencing of D<sub>2</sub>R on the expression of pro-inflammatory cytokines/chemokines in mouse RPTCs. Cells were cultured to 60–70% confluence and transfected with non-silencing (NS siRNA) or *Drd2* siRNA. After 48 h the cells were washed and lysed. Protein expression of D<sub>2</sub>R (55 kDa), TNF $\alpha$  (25 kDa), and MCP-1 (17 kDa) was semi-quantified by immunoblotting. Inset shows one set of immunoblots. NF $\kappa$ B activation was analyzed via the transient expression of a NF $\kappa$ B-luciferase reporter system by reverse transfection. Results are expressed as percentage of NS siRNA or fold activation compared to NS siRNA. \* $P < 0.05$  vs. NS (non-silencing) siRNA,  $n = 4$ /group. **B.** Effects of Ang II and D<sub>2</sub>R stimulation on TNF $\alpha$  and MCP-1 in mouse RPTCs. Cells were serum starved for 2 h before treatment for 24 h in serum-free medium with vehicle (PBS) or 100 nM Ang II, in the presence or absence of 1  $\mu$ M quinpirole (D<sub>2</sub>R/D<sub>3</sub>R agonist) or 1  $\mu$ M quinpirole plus 1  $\mu$ M L-741,262 (D<sub>2</sub>R antagonist). Expression of TNF $\alpha$  (25 kDa) and MCP-1 (17 kDa) protein was semi-quantified by immunoblotting. Inset shows one set of immunoblots. Results were corrected for actin and expressed as % of vehicle. \*  $P < 0.05$  vs. vehicle;  $n = 6$ /group. doi:10.1371/journal.pone.0038745.g004

Further experiments were focused on the TNF and MCP families and on IL-6 and IL-10, both of which are downstream TNF $\alpha$ , and on NF $\kappa$ B, which is activated and increased by TNF $\alpha$  transcription [29,30]. IL-6 is involved in the development of renal inflammation and injury [31], and IL-10 has potent anti-inflammatory properties, repressing the expression of TNF $\alpha$ , IL-6, and IL-1 [32]. We also quantified the expression of p50, the DNA binding subunit of NF $\kappa$ B protein complex, a parameter of NF $\kappa$ B activation [33]. Increased renal cortex expression of Lt $\alpha$ , MCP-2, and NF $\kappa$ B1 (p50) in D<sub>2</sub><sup>-/-</sup> mice was confirmed by qRT-PCR and found to be four-, five-, and two -fold higher, respectively, than in D<sub>2</sub><sup>+/+</sup> (Figure 2A). Increased protein expression of MCP-1 (270 $\pm$ 30 vs 100 $\pm$ 15%)

and TNF $\alpha$  (163 $\pm$ 7 vs 100 $\pm$ 3%) was confirmed by western blot (Figure 2B). Protein expressions of IL-6 and IL-10 in renal cortex were also increased by about 30% and 60% respectively, and urinary excretion of IL-6 was about three-fold higher while that of IL-10 was about five-fold higher in D<sub>2</sub><sup>-/-</sup> than in D<sub>2</sub><sup>+/+</sup> mice (Figure 2C). Decreased renal cortical mRNA expression of IL-4, IL-11, and IL-13 was also confirmed by qRT-PCR (data not shown).

The gene expression of chemokines/cytokines in the heart left ventricle was also determined by qRT-PCR. The expressions of MCP-1, MCP-2, TNF $\alpha$ , and Lt $\alpha$ , as well as IL-11, IL-13, and IL-5 receptor  $\alpha$ , were similar in D<sub>2</sub><sup>-/-</sup> and D<sub>2</sub><sup>+/+</sup> mice (Table 2). This indicated that renal alterations in pro- and anti-inflammatory

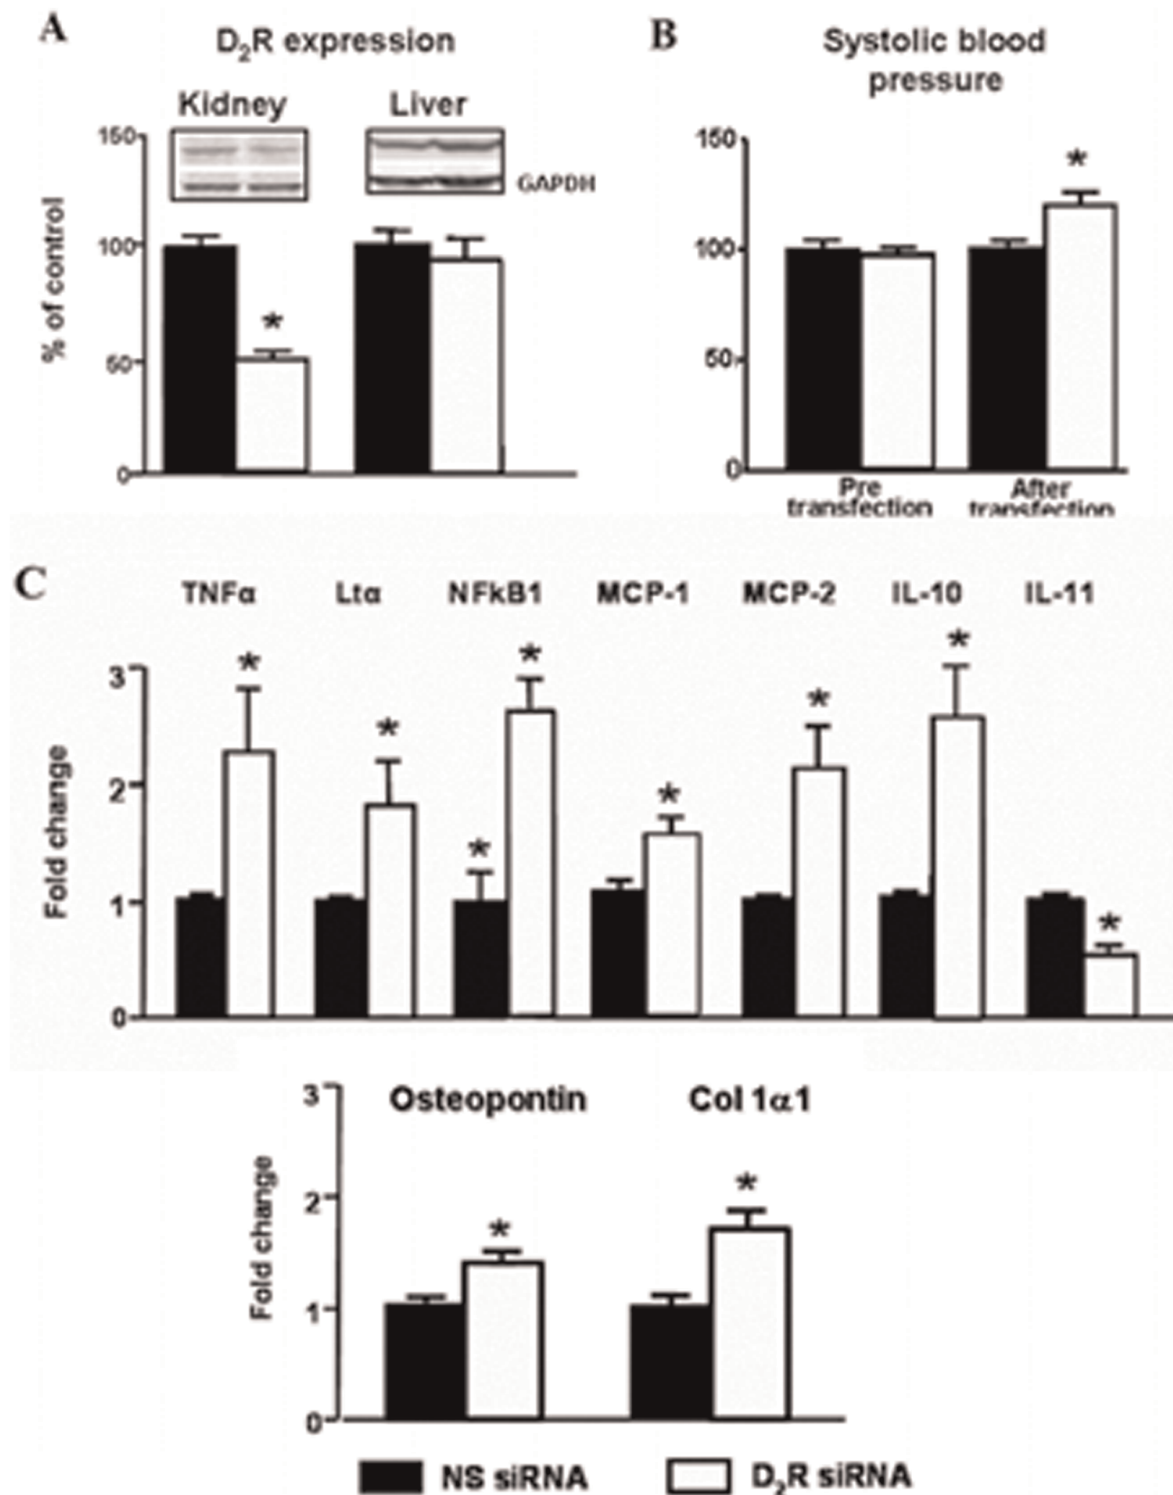

**Figure 5. Effect of selective renal silencing of D<sub>2</sub>R in the remaining kidney of uni-nephrectomized mice on blood pressure and expression on inflammatory factors in the kidney and liver.** Renal cortical *Drd2* was silenced by the renal subcapsular infusion for seven days of *Drd2* siRNA, via an osmotic minipump in uni-nephrectomized adult male C57BL/6J mice (see Methods). A. Expression of D<sub>2</sub>R protein (55 kDa band) in renal cortex and liver was semi-quantified by immunoblotting. Results were corrected for GAPDH and expressed as % of non-silencing siRNA treated kidneys. \*  $P < 0.05$  vs non-silencing (NS) siRNA;  $n = 5$ /group. B. Systolic blood pressure measured under anesthesia in mice before and seven days after *Drd2* siRNA infusion. \*  $P < 0.05$  vs, NS siRNA;  $n = 5$ /group. C. Renal cortical expression of TNF $\alpha$ , Lta, NFkB1, MCP-1, MCP-2, IL-10, IL-11 osteopontin, and Col 1 $\alpha$ 1 mRNA was quantified by qRT-PCR, results corrected for expression of GAPDH mRNA, and expressed as fold change in comparison to their expression in mice treated with NS siRNA. \*  $P < 0.05$  vs. NS;  $n = 5$ /group. doi:10.1371/journal.pone.0038745.g005

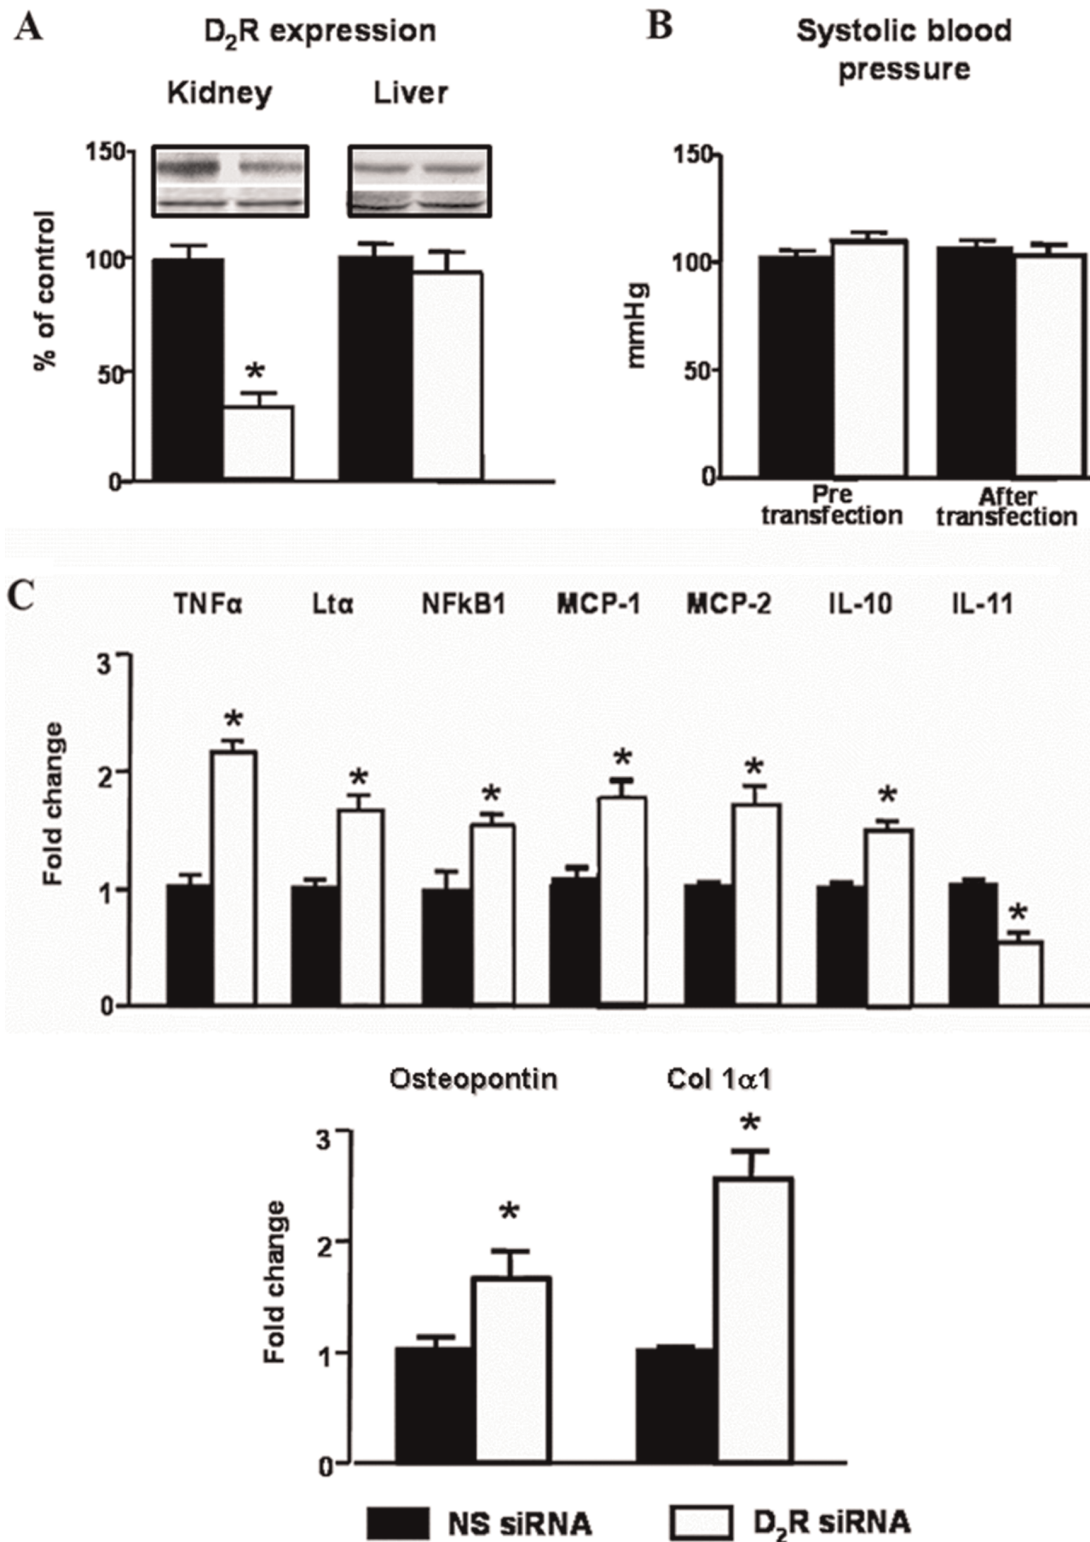

**Figure 6. Effect of selective renal silencing of D<sub>2</sub>R in one kidney of mice without uni-nephrectomy on blood pressure and expression of inflammatory factors in the kidney and liver.** Renal cortical D<sub>2</sub>R was silenced by the renal subcapsular infusion in the left kidney for seven days of *Drd2* siRNA, via an osmotic minipump in adult male C57BL/6J mice (see Methods). A. Expression of D<sub>2</sub>R protein (55 kDa band) in renal cortex and liver was semi-quantified by immunoblotting. Results were corrected for GAPDH and expressed as % of NS siRNA treated kidneys. \* P<0.05 vs non-silencing NS siRNA; n = 4/group. B. Systolic blood pressure measured under anesthesia in mice before and seven days after *Drd2* siRNA infusion; n = 5/group. C. Renal cortical expression of TNF $\alpha$ , Lt $\alpha$ , NFkB1, MCP-1, MCP-2, IL-10, IL-11, osteopontin and collagen 1 $\alpha$ 1 mRNA was quantified by qRT-PCR, results corrected for expression of GAPDH mRNA, and expressed as fold change in comparison to their expression in mice treated with NS siRNA. \*P<0.05 vs. NS; n = 5/group. doi:10.1371/journal.pone.0038745.g006



factors in  $D_2^{-/-}$  mice were organ specific and not caused by systemic perturbations.

### Decreasing Blood Pressure and ROS does not Normalize the Expression of Inflammatory Factors in Renal Cortex of $D_2^{-/-}$ Mice

Treatment with apocynin decreased systolic blood pressure in  $D_2^{-/-}$  mice (vehicle:  $121 \pm 5$ ; apocynin:  $96 \pm 2$  mm Hg;  $n = 5$ ;  $P < 0.05$ ) but not in  $D_2^{+/+}$  mice (vehicle:  $98 \pm 3$ ; apocynin  $95 \pm 5$  mmHg;  $n = 5$ ). Apocynin also decreased the urinary excretion of the oxidative stress marker 8-isoprostane in  $D_2^{-/-}$  mice (vehicle:  $3166 \pm 456$ ; apocynin:  $1874 \pm 553$  pg/mg creatinine;  $n = 5$ ,  $P < 0.04$ ) to levels similar to those in wild-type mice (vehicle:  $1344 \pm 365$ ; apocynin:  $1542 \pm 280$  pg/mg creatinine;  $n = 5$ ). Treatment with apocynin, however, did not normalize the expression of TNF $\alpha$ , MCP-1, or IL-6 in  $D_2^{-/-}$  mice. TNF $\alpha$  expression in renal cortex was higher in vehicle-treated  $D_2^{-/-}$  than vehicle-treated  $D_2^{+/+}$  mice; apocynin had no effect on TNF $\alpha$  expression in  $D_2^{+/+}$  or  $D_2^{-/-}$  mice. MCP-1 protein expression was also higher in vehicle-treated  $D_2^{-/-}$  than in vehicle-treated  $D_2^{+/+}$  mice; apocynin had no effect on MCP-1 expression in  $D_2^{+/+}$  mice but decreased it in  $D_2^{-/-}$  mice although not to the level observed in  $D_2^{+/+}$  mice (Figure 3). Renal cortical IL-6 protein expression and urinary excretion of IL-6 were also higher in vehicle-treated  $D_2^{-/-}$  than in vehicle-treated  $D_2^{+/+}$  mice; apocynin had no effect on IL-6 in  $D_2^{+/+}$  mice but modestly decreased its levels in  $D_2^{-/-}$  mice although they remained higher than  $D_2^{+/+}$  mice (Figure 3).

### *Drd2* Silencing in Mouse RPTCs Results in Increased NF $\kappa$ B Transcriptional Activity and TNF $\alpha$ and MCP-1 Expression

Mouse RPTCs in culture endogenously express  $D_2$ R, TNF $\alpha$ , and MCP-1. Forty-eight hour-treatment with *Drd2* siRNA decreased  $D_2$ R protein expression by about 85%. The treatment increased NF $\kappa$ B transcriptional activity (3.5-fold) and about two-fold the expression of both TNF $\alpha$ , and MCP-1 which are downstream of NF $\kappa$ B (Figure 4A).

### Stimulation of $D_2$ R Counteracts the Effects of Ang II in Mouse RPTCs

Treatment with Ang II (100 nmol/l) increased the expression of TNF $\alpha$  by about 50% and that of MCP-1 about 60% in mouse RPTCs. Treatment with quinpirole (1  $\mu$ mol/l), a  $D_2$ R/ $D_3$ R agonist, prevented the stimulatory effect of Ang II on the expression of TNF $\alpha$  and MCP-1. The effect of quinpirole was blocked by the addition of L-741,262, a selective  $D_2$ R antagonist (Figure 4B).

### Renal Specific *Drd2* Down-regulation Recapitulates the Effects of Germline *Drd2* Knockout on Inflammatory Factors Independently of Changes in Blood Pressure

To determine further the role of  $D_2$ R in the renal inflammatory reaction, we acutely and selectively silenced renal *Drd2*s in mice in order to avoid the confounding effects of systemic  $D_2$ R deletion. Infusion of *Drd2* siRNA for seven days in uni-nephrectomized mice decreased renal cortical expression of  $D_2$ R by 50% but did not affect the expression of the receptor in the liver, indicating renal selectivity of the down-regulation (Figure 5A). As with systemic *Drd2* deletion, treatment with *Drd2* siRNA increased systolic blood pressure by about 20 mmHg (Figure 5B), an increase of the same magnitude of that observed in mice with systemic *Drd2* deletion [3,4]. This highlights the role of  $D_2$ R in the regulation of blood pressure via the kidney. Subcapsular renal

*Drd2* silencing in uni-nephrectomized mice increased renal cortical mRNA expression of TNF $\alpha$ , Lt $\alpha$ , NF $\kappa$ B1, MCP-2 and IL-10, and simultaneously decreased the expression of IL-11. These results are similar to those found in mice with systemic *Drd2* deletion, confirming the role of renal  $D_2$ R in the regulation of the expression of inflammatory factors. Furthermore, the expression of osteopontin and Col 1 $\alpha$ 1, markers of tissue damage [34], was also increased in the kidneys with silenced  $D_2$ Rs (Figure 5C).

In order to eliminate the confounding effect of uni-nephrectomy and the increase in blood pressure in the above experiments, we also studied the effect of chronic unilateral renal subcapsular infusion of *Drd2* siRNA in mice with two intact kidneys. Selective down-regulation of *Drd2* in one kidney (Figure 6A) had no effect on systolic blood pressure (Figure 6B), suggesting that the intact kidney, in the short-term, is able to compensate for the effects of decreased *Drd2* expression in the treated kidney. The mRNA expression of TNF $\alpha$ , Lt $\alpha$ , NF $\kappa$ B1, MCP-1 and MCP-2 was increased in the treated kidney to the same extent as in treated uni-nephrectomized mice; NF $\kappa$ B1 and IL-10 were increased but to a lesser extent than in uni-nephrectomized mice. The mRNA expression of IL-11 was similarly decreased. In contrast the expression of the injury markers osteopontin and Col 1 $\alpha$ 1 was increased to a greater extent than in infused remnant kidney of uni-nephrectomized mice (Figure 6C).

## Discussion

Our results show increased renal expression of pro-inflammatory and decreased expression of anti-inflammatory cytokines/chemokines, as well as histological and functional evidence of renal inflammation and injury in mice lacking  $D_2$ Rs. These alterations are renal-specific and are mimicked in mouse RPTCs in which the *Drd2* is silenced. Moreover, selective unilateral renal  $D_2$ R down-regulation in mice with two kidneys, in the absence of elevated blood pressure, reproduced the alterations in inflammatory factors and renal injury observed in  $D_2^{-/-}$  mice. Thus, our findings indicate that  $D_2$ Rs in the kidney have a direct and significant role in regulating the mechanisms involved in the development of renal inflammation and injury, as well as in blood pressure control.

Chemokines that play an essential role in the direct migration of various types of immune cells were up-regulated in kidneys of  $D_2^{-/-}$  mice, *Drd2*-silenced kidneys and RPTCs. In several models of renal injury, MCP-1 and RANTES are expressed in damaged renal tissues and precede the recruitment of inflammatory cells that is a characteristic of many kidney diseases [7]. The infiltrating cells mediate the initiation and progression of injury by direct cytotoxicity, secretion of pro-inflammatory cytokines, and the induction of other pro-inflammatory mediators in renal tubule cells.

The increased gene transcription/protein expression of inflammatory factors with *Drd2* silencing may be caused by decreased  $D_2$ R-dependent inhibition leading to increased production of TNF $\alpha$ , a major regulator of cytokine/chemokine expression. Experimental and clinical studies have demonstrated the role of TNF $\alpha$  as a mediator of inflammatory tissue damage in the pathogenesis of acute and chronic renal disease. TNF $\alpha$  is released from renal cells in response to injury and induces glomerular fibrin deposition, cellular infiltration, and vasoconstriction [35] but causes marked natriuresis [36]. TNF $\alpha$  stimulation increases the expression of IL-6, IL-10, and MCP-1 [22]. In immune cells, TNF $\alpha$  production is decreased by dopamine and  $D_2$ R agonists [21] and in adrenal cortical cells, dopamine, through the  $D_2$ R, inhibits basal and secretagogue-stimulated TNF $\alpha$ . Our results in mouse RPTCs showing increased basal TNF $\alpha$  expression

in response to *Drd2* silencing and inhibition of Ang II-induced TNF $\alpha$  stimulation by D<sub>2</sub>R activation, indicate that in RPTCs the D<sub>2</sub>R negatively regulates both basal and Ang II-stimulated TNF $\alpha$  production.

TNF $\alpha$  and other members of the TNF superfamily regulate the expression of a large number of cytokines and chemokines by several mechanisms [37], one of which is the activation and nuclear translocation of NF $\kappa$ B [38]. NF $\kappa$ B, which is activated by TNF $\alpha$ , mediates the inflammatory response to TNF $\alpha$ , IL-1 $\beta$ , and other inflammatory factors in renal cells [33]. In turn, the transcription of TNF $\alpha$  and TNF superfamily members is increased by NF $\kappa$ B activation, generating a positive-feedback loop of activation [39]. Our data show that deficient D<sub>2</sub>R expression results in NF $\kappa$ B activation, as indicated by the increased renal expression of NF $\kappa$ B1 (p50) and NF $\kappa$ B transcriptional activity in mouse RPTCs. NF $\kappa$ B has been implicated as a factor in diabetic nephropathy [40]. Because the D<sub>2</sub>R has been shown to positively regulate NF $\kappa$ B activation in neural-derived cell lines [41,42] it is likely that the negative regulation observed in the current studies is mediated by its direct effects on TNF $\alpha$  expression and function. Most of the down-regulated cytokines in the renal cortex of D<sub>2</sub><sup>-/-</sup> mice are Th2-type cytokines (e.g., IL-4 and IL-13); the transcription of these cytokines is mainly dependent on factors other than TNF $\alpha$  or NF $\kappa$ B [43] and is negatively regulated by Th1-type cytokines [44].

The hypertension noted in D<sub>2</sub><sup>-/-</sup> mice is at least partially related to increased renal production of ROS [4]. To evaluate the potentially confounding effect of high blood pressure and ROS on renal inflammation, we treated D<sub>2</sub><sup>-/-</sup> mice with apocynin, which normalized both blood pressure and ROS production [4] as it does in several experimental models of hypertension [45]. Apocynin had no significant effect on the expression of TNF $\alpha$ , and IL-6, although it decreased MCP-1 expression. These results suggest that, in D<sub>2</sub><sup>-/-</sup> mice, high blood pressure or increased ROS may contribute but neither is the major cause of the increased expression of pro-inflammatory factors. However, an effect of persistent inflammation due to preexisting hypertension cannot be ruled out.

The selective unilateral renal silencing of D<sub>2</sub>R for seven days, in mice with two kidneys, did not increase blood pressure but nonetheless increased renal expression of pro-inflammatory chemokines/cytokines and decreased expression of the anti-inflammatory, IL-11. This indicates that hypertension, per se, is

not necessary for the development of renal inflammation but may be a contributing factor. Moreover, the expression of the anti-inflammatory, IL-10, was increased, indicating some compensatory feed-back mechanism. Nevertheless, our results show that impaired D<sub>2</sub>R function (due to decreased D<sub>2</sub>R expression) results in a defective balance of pro-inflammatory and anti-inflammatory factors that contribute to renal inflammation and injury.

As mentioned above, intrarenal dopamine buffers the deleterious effects of Ang II on renal inflammation and injury [16,17]. Our results suggest that these effects are mediated by the D<sub>2</sub>R. Infusion of Ang II in rats increases TNF $\alpha$  production in renal glomerular endothelial cells, tubules, and vessels, and enhances expression of MCP-1 [22]. Stimulation of the D<sub>2</sub>R reversed the increased expression of TNF $\alpha$  and MCP-1 elicited by Ang II in mouse RPTCs, indicating that D<sub>2</sub>R may counterbalance the damaging effect of Ang II in the kidney.

The current studies contribute to the understanding of the mechanisms that cause the development of renal inflammation, as well as the development and maintenance of hypertension [5] and suggest that decreased D<sub>2</sub>R function may play a significant role in these processes. Deficient renal D<sub>2</sub>R function may be of clinical relevance since polymorphisms of the *Drd2* gene, that are commonly observed in humans, result in decreased D<sub>2</sub>R expression and function as a consequence of decreased D<sub>2</sub>R mRNA stability and decreased synthesis of the receptor or decreased receptor affinity [46–50]. Some of the D<sub>2</sub>R polymorphisms are associated with elevated blood pressure and essential hypertension [51–53]. Moreover, a recent study in an Asian Indian population with type 2 diabetes found that a D<sub>2</sub>R polymorphism, resulting in decreased expression of the receptor, confers susceptibility to chronic diabetic nephropathy [54]. Further studies are needed to establish the role of D<sub>2</sub>R polymorphisms in conferring susceptibility to chronic renal disease and to determine whether or not modulation of renal D<sub>2</sub>R function may be an option in the treatment of hypertension and renal injury.

## Author Contributions

Conceived and designed the experiments: IA LDA CE AMP JEJ. Performed the experiments: YZ SC LDA CE YY AMP XW JEJ IA. Analyzed the data: YZ SC LDA YY XW PAJ IA. Contributed reagents/materials/analysis tools: DG JEJ. Wrote the paper: YZ SC LDA CE YY AMP XW JEJ DG GE PAJ IA.

## References

1. Jose PA, Soares-da-Silva P, Eisner GM, Felder RA (2010) Dopamine and G protein-coupled receptor kinase 4 in the kidney: Role in blood pressure regulation. *Biochim Biophys Acta* 802: 1259–1267.
2. Zeng C, Armando I, Luo Y, Eisner GM, Felder RA, et al. (2008) Dysregulation of dopamine-dependent mechanisms as a determinant of hypertension: studies in dopamine receptor knockout mice. *Am J Physiol Heart Circ Physiol* 294: H551–H569.
3. Li XX, Bek M, Asico LD, Yang Z, Grandy DK, et al. (2001) Adrenergic and endothelin B receptor-dependent hypertension in dopamine receptor type-2 knockout mice. *Hypertension* 38: 303–308.
4. Armando I, Wang X, Villar VA, Jones JE, Asico LD, et al. (2007) Reactive oxygen species-dependent hypertension in dopamine D2 receptor-deficient mice. *Hypertension* 49: 672–678.
5. Harrison DG, Guzik TJ, Lob HE, Madhur MS, Marvar PJ, et al. (2011) Inflammation, immunity, and hypertension. *Hypertension* 57: 132–140.
6. Segerer S, Schlöndorff D (2007) Role of Chemokines for the Localization of Leukocyte Subsets in the Kidney. *Semin Nephrol* 27: 260–274.
7. Wang Y, Tay YC, Harris DC (2004) Proximal tubule cells stimulated by lipopolysaccharide inhibit macrophage activation. *Kidney Int* 66: 655–662.
8. Bendele AM, Spaeth SM, Benslay DN, Bryant HU (1991) Anti-inflammatory activity of pergolide, a dopamine receptor agonist. *J Pharmacol Exp Ther* 259: 169–175.
9. Ghosh MC, Mondal AC, Basu S, Banerjee S, Majumder J, et al. (2003) Dopamine inhibits cytokine release and expression of tyrosine kinases, Lck and Fyn in activated T cells. *Int Immunopharmacol* 3: 1019–1026.
10. Haskó G, Szabó C, Németh ZH, Deitch EA (2002) Dopamine suppresses IL-12 p40 production by lipopolysaccharide-stimulated macrophages via a  $\beta$ -adrenoceptor-mediated mechanism. *J Neuroimmunol* 122: 34–39.
11. Bach F, Grundmann U, Bauer M, Buchinger H, Soltész S, et al. (2002) Modulation of the inflammatory response to cardiopulmonary bypass by dexamethasone and epidural anesthesia. *Acta Anesthesiol Scand* 46: 1227–1235.
12. Birnbaum J, Klotz E, Spies CD, Lorenz B, Stuebs P, et al. (2006) Effects of dexamethasone on the intestinal microvascular blood flow and leukocyte activation in a sepsis model in rats. *Crit Care* 10: R117–124.
13. Zhu XH, Zellweger R, Wichmann MW, Ayala A, Chaudry IH (2007) Effects of prolactin and metoclopramide on macrophage cytokine gene expression in late sepsis. *Cytokine* 9: 437–446.
14. Hoeger S, Gottmann U, Liu Z, Schnuelle P, Birck R, et al. (2007) Dopamine treatment in brain-dead rats mediates anti-inflammatory effects: the role of hemodynamic stabilization and D-receptor stimulation. *Transpl Int* 20: 790–799.
15. Hoeger S, Reisenbuechler A, Gottmann U, Doyon F, Braun C, et al. (2008) Donor dopamine treatment in brain dead rats is associated with an improvement in renal function early after transplantation and a reduction in renal inflammation. *Transpl Int* 21: 1072–1080.

16. Zhang MZ, Yao B, Wang S, Fan X, Wu G, et al. (2011). Intrarenal dopamine deficiency leads to hypertension and decreased longevity in mice. *J Clin Invest* 121: 2845–2854.
17. Yang S, Yao B, Zhou Y, Yin H, Zhang MZ, et al. (2012). Intrarenal dopamine modulates progressive angiotensin II-mediated renal injury. *Am J Physiol Renal Physiol* 302: F742–F749.
18. Levite M (2008) Neurotransmitters activate T-cells and elicit crucial functions via neurotransmitter receptors. *Curr Opin Pharmacol* 8: 460–471.
19. Morikawa K, Oseko F, Morikawa S (1994) Immunosuppressive activity of bromocriptine on human T lymphocyte function in vitro. *Clin Exp Immunol* 95: 514–518.
20. Besser MJ, Ganor Y, Levite M (2005) Dopamine by itself activates either D2, D3 or D1/D5 dopaminergic receptors in normal human t-cells and triggers the selective secretion of either IL-10, TNF $\alpha$  or both. *J Neuroimmunol* 169: 161–171.
21. Laengle UW, Markstein R, Pralet D, Seewald W, Roman D (2006) Effect of GLC756, a novel mixed dopamine D1 receptor antagonist and dopamine D2 receptor agonist, on TNF- $\alpha$  release in vitro from activated rat mast cells. *Exp Eye Res* 83: 1335–1339.
22. Ruiz-Ortega M, Ruperez M, Lorenzo O, Esteban V, Blanco J, et al. (2002) Angiotensin II regulates the synthesis of proinflammatory cytokines and chemokines in the kidney. *Kidney Int* 82: S12–22.
23. Woost PG, Kolb RJ, Finesilver M, Mackraj I, Imboden H, et al. (2006) Strategy for the development of a matched set of transport-competent, angiotensin receptor-deficient proximal tubule cell lines. *In Vitro Cell Dev Biol Anim* 42: 189–200.
24. Ferguson SM, Norton CS, Watson SJ, Akil H, Robinson TE (2003) Amphetamine-evoked c-fos mRNA expression in the caudate-putamen: the effects of DA and NMDA receptor antagonists vary as a function of neuronal phenotype and environmental context. *J Neurochem* 86: 33–44.
25. Livak KJ, Schmittgen TD (2001) Analysis of relative gene expression data using real-time quantitative PCR and the 2<sup>- $\Delta\Delta$ CT</sup> method. *Methods* 25: 402–408.
26. Yoneda M, Sanada H, Yatabe J, Midorikawa S, Hashimoto S, et al. (2005) Differential effects of angiotensin II type-1 receptor antisense oligonucleotides on renal function in spontaneously hypertensive rats. *Hypertension* 48: 58–65.
27. Bonecchi R, Galliera E, Borroni EM, Corsi M, Locati M, et al. (2009) Chemokines and chemokine receptors: an overview. *Front Biosci* 14: 540–551.
28. Romagnani P, Beltrame C, Annunziato F, Lasagni L, Luconi M, et al. (1999) Role for interactions between IP-10/Mig and CXCR3 in proliferative glomerulonephritis. *J Am Soc Nephrol* 10: 2518–2526.
29. Zheng L, Sinniah R, I-Hong Hsu S (2008). Pathogenic Role of NF $\kappa$ B activation in tubulointerstitial inflammatory lesions in human lupus nephritis. *J Histochem Cytochem* 56: 517–529.
30. Aggarwal BB (2003) Signalling pathways of the TNF superfamily: A double-edged sword. *Nat Rev Immunol* 3: 745–756.
31. Patel NS, Chatterjee PK, Di Paola R, Mazzone E, Britti D, et al. (2005) Endogenous interleukin-6 enhances the renal injury, dysfunction, and inflammation caused by ischemia/reperfusion. *J Pharmacol Exp Ther* 312: 1170–1178.
32. Mosser DM, Zhang X (2008) Interleukin-10: new perspectives on an old cytokine. *Immunol Rev* 226: 205–218.
33. Sanz AB, Sanchez-Niño MD, Ramos AM, Moreno JA, Santamaria B, et al. (2010) NF $\kappa$ B in renal inflammation. *J Am Soc Nephrol* 21: 1254–1262.
34. Lea WB, Kwak ES, Luther JM, Fowler SM, Wang Z, et al. (2009) Aldosterone antagonism or synthase inhibition reduces end-organ damage induced by treatment with angiotensin and high salt. *Kidney Int*. 75: 936–944.
35. Donahoo KK, Shames BD, Harken AH, Meldrum DR (1999) Review article: the role of tumor necrosis factor in renal ischemia-reperfusion injury. *J Urol* 162: 196–203.
36. Shahid M, Francis J, Matrougui K, Majid DS (2010) Involvement of tumor necrosis factor- $\alpha$  in natriuretic response to systemic infusion of nitric oxide synthase inhibitor in anesthetized mice. *Am J Physiol Renal Physiol* 299: F217–F224.
37. Dempsey PW, Doyle SE, He JQ, Cheng G (2003) The signaling adaptors and pathways activated by TNF superfamily. *Cytokine Growth Factor Rev* 14: 193–209.
38. Li Q, Verma IM (2002) NF $\kappa$ B regulation in the immune system. *Nat Rev Immunol* 2: 725–734.
39. Covert MW, Leung TH, Gaston JE, Baltimore D (2005) Achieving stability of lipopolysaccharide-induced NF $\kappa$ B activation. *Science* 309: 1954–1957.
40. Pergola PE, Raskin P, Toto RD, Meyer CJ, Huff JW, et al. (2011) Bardoxolone methyl and kidney function in CKD with type 2 diabetes. *N Engl J Med* 365: 327–336.
41. Yang M, Zhang H, Voyno-Yasenetskaya T, Ye RD (2003) Requirement of G $\beta\gamma$  and c-Src in D2 dopamine receptor-mediated nuclear factor- $\kappa$ B activation. *Mol Pharmacol* 64: 447–455.
42. Takeuchi Y, Fukunaga K (2003) Differential regulation of NF- $\kappa$ B, SRE and CRE by dopamine D1 and D2 receptors in transfected NG108-15 cells. *J Neurochem* 85: 729–739.
43. Lavender P, Cousins D, Lee T (2000) Regulation of Th2 cytokine gene transcription. *Chem Immunol* 78: 16–29.
44. Zhu J (2010) Transcriptional regulation of Th2 cell differentiation. *Immunol Cell Biol* 88: 244–249.
45. Tian N, Moore RS, Phillips WE, Lin L, Braddy S, et al. (2008) NADPH oxidase contributes to renal damage and dysfunction in Dahl salt-sensitive hypertension. *Am J Physiol Regul Integr Comp Physiol* 295: R1858–R1865.
46. Duan J, Wainwright MS, Comeron JM, Saitou N, Sanders AR, et al. (2003) Synonymous mutations in the human dopamine receptor D2 (DRD2) affect mRNA stability and synthesis of the receptor. *Hum Mol Genet* 12: 205–216.
47. Thompson J, Thomas N, Singleton A, Piggott M, Lloyd S, et al. (1997) D2 dopamine receptor gene (DRD2) Taq1A polymorphism: reduced dopamine D2 receptor binding in the human striatum associated with the A1 allele. *Pharmacogenetics* 7: 479–484.
48. Pohjalainen T, Rinne JO, Nägren K, Lehtikoinen P, Anttila K, et al. (1998) The A1 allele of the human D2 dopamine receptor gene predicts low D2 receptor availability in healthy volunteers. *Mol Psychiatry* 3: 256–260.
49. Jönsson EG, Nöthen MM, Grünhage F, Farde L, Nakashima Y, et al. (1999) Polymorphisms in the dopamine D2 receptor gene and their relationships to striatal dopamine receptor density of healthy volunteers. *Mol Psychiatry* 4: 290–296.
50. Ritchie T, Noble EP (2003) Association of seven polymorphisms of the D2 dopamine receptor gene with brain receptor-binding characteristics. *Neurochem Res* 28: 73–82.
51. Fang YJ, Thomas GN, Xu ZL, Fang JQ, Critchley JA, et al. (2005) An affected pedigree member analysis of linkage between the dopamine D2 receptor gene TaqI polymorphism and obesity and hypertension. *Int J Cardiol* 102: 111–116.
52. Rosmond R, Rankinen T, Chagnon M, Pérusse L, Chagnon YC, et al. (2001) Polymorphism in exon 6 of the dopamine D(2) receptor gene (DRD2) is associated with elevated blood pressure and personality disorders in men. *J Hum Hypertens* 15: 553–558.
53. Thomas GN, Critchley JA, Tomlinson B, Cockram CS, Chan JC (2001) Relationships between the taqI polymorphism of the dopamine D2 receptor and blood pressure in hyperglycaemic and normoglycaemic Chinese subjects. *Clin Endocrinol (Oxf)* 55: 605–611.
54. Prasad P, Kumar KM, Ammini AC, Gupta A, Gupta R, et al. (2008) Association of dopaminergic pathway gene polymorphisms with chronic renal insufficiency among Asian Indians with type-2 diabetes. *BMC Genet* 9: 26.
